# Supplementary material for: Minimizing biological sludge generation in a sidestream enhanced biological phosphorus removal (S2EBPR) system: full-scale evaluation and modeling insights
Source: Royal Society of Chemistry journal article supplement (doi:10.1039/d4ew00115j), 2024-01-01
Supplement: d4ew00115j1.pdf [file d4ew00115j1.pdf]

# Supplementary Information

## **Minimizing biological sludge generation in a sidestream enhanced biological phosphorus removal (S2EBPR) system: full-scale evaluation and modeling insights**

Raffaele Morello<sup>1,2</sup>, Francesco Di Capua<sup>3,\*</sup>, McKenna Farmer<sup>4</sup>, Patrick Dunlap<sup>5</sup>, Cindy Dongqi Qin<sup>6</sup>, Joseph Kozak<sup>6</sup>, Danilo Spasiano<sup>1</sup>, Fabrizio Sabba<sup>5</sup>

<sup>1</sup> Department of Civil, Environmental, Land, Building Engineering and Chemistry,  
Polytechnic University of Bari, Via E. Orabona 4, 70125, Bari, Italy

<sup>2</sup> Department of Agricultural and Environmental Sciences (Di.S.A.A.T), University of Bari,  
via Amendola 165/A, 70126 Bari, Italy

<sup>3</sup> School of Engineering, University of Basilicata, via dell'Ateneo Lucano 10, Potenza, 85100,  
Italy

<sup>4</sup> Department of Civil and Environmental Engineering, Northwestern University, Evanston  
IL, USA

<sup>5</sup> Black & Veatch, KS, USA

<sup>6</sup> Metropolitan Water Reclamation District of Greater Chicago, IL, USA

\*Corresponding author. Email: [francesco.dicapua@unibas.it](mailto:francesco.dicapua@unibas.it)

### **The following are included as supporting information for this paper:**

Number of pages: 6

Number of figures: 1

Number of Tables: 2

**Table S1:** Average influent fractions at the Calumet WRP (as reported also in Sabba et al.<sup>1</sup>).

| <b>Parameter</b>                                                                                              | <b>Value</b> | <b>Unit</b> |
|---------------------------------------------------------------------------------------------------------------|--------------|-------------|
| Fraction of VSS/TSS                                                                                           | 90.0         | %           |
| Fraction of filtered COD (SCCOD, 1.5 $\mu\text{m}$ , incl. colloids) in total COD (TCOD)                      | 36.0         | %           |
| Fraction of flocculated filtered (SCOD, wo colloids) COD in total COD (TCOD)                                  | 20.0         | %           |
| Fraction of VFA in filtered COD (SCCOD, 1.5 $\mu\text{m}$ , incl. colloids)                                   | 0.0          | %           |
| Fraction of soluble unbiodegradable organics (SU) in filtered COD (SCCOD, 1.5 $\mu\text{m}$ , incl. colloids) | 23.0         | %           |
| Fraction of particulate unbiodegradable organics (XU) in total COD (TCOD)                                     | 16.0         | %           |
| Fraction of heterotrophs (OHO) in total COD (TCOD)                                                            | 2.0          | %           |
| Fraction of endogenous products (XE) of OHOs                                                                  | 7.0          | %           |
| Fraction of colloidal unbiodegradable organics (CU) in colloidal COD (SCCOD-SCOD)*                            | 0.0          | %           |
| Fraction of NH <sub>x</sub> in total Kjeldahl nitrogen (TKN)                                                  | 67.3         | %           |
| Fraction of PO <sub>4</sub> in total phosphorus (TP)                                                          | 74.4         | %           |
| Fraction of N in readily biodegradable substrate (SB)*                                                        | 0.0          | %           |
| Fraction of N in particulate unbiodegradable substrate (XU)*                                                  | 0.0          | %           |
| Fraction of P in readily biodegradable substrate (SB)*                                                        | 0.0          | %           |
| Fraction of P in particulate unbiodegradable substrate (XU)*                                                  | 0.0          | %           |

*\*plant-specific model assumptions*

**Table S2:** SUMO default kinetic parameters used in the model (as reported also in Sabba et al.<sup>1</sup>).

| <b>Ordinary heterotrophic organism kinetics (OHO)</b> |                                                                                               |                |                                   |
|-------------------------------------------------------|-----------------------------------------------------------------------------------------------|----------------|-----------------------------------|
| <b>Symbol</b>                                         | <b>Name</b>                                                                                   | <b>Default</b> | <b>Unit</b>                       |
| $\mu_{\text{OHO}}$                                    | Maximum specific growth rate of OHOs                                                          | 4.0            | d <sup>-1</sup>                   |
| $\mu_{\text{FERM,OHO}}$                               | Fermentation growth rate of OHOs                                                              | 0.3            | d <sup>-1</sup>                   |
| $b_{\text{OHO}}$                                      | Decay rate of OHOs                                                                            | 0.62           | d <sup>-1</sup>                   |
| $\eta_{\text{OHO,anox}}$                              | Reduction factor for anoxic growth of OHOs                                                    | 0.60           | unitless                          |
| $K_{\text{SB,AS}}$                                    | Half-saturation of readily biodegradable substrate for OHOs (AS)                              | 5.0            | g COD.m <sup>-3</sup>             |
| $K_{\text{O}_2,\text{OHO,AS}}$                        | Half-saturation of O <sub>2</sub> for OHOs (AS)                                               | 0.15           | g O <sub>2</sub> .m <sup>-3</sup> |
| $K_{\text{VFA,AS}}$                                   | Half-saturation of VFA for OHOs (AS)                                                          | 0.5            | g COD.m <sup>-3</sup>             |
| $K_{\text{MEOL,OHO,AS}}$                              | Half-saturation of methanol for OHOs (AS)                                                     | 0.1            | g COD.m <sup>-3</sup>             |
| $K_{\text{NO}_3,\text{OHO,AS}}$                       | Half-saturation of NO <sub>3</sub> for OHOs (AS)                                              | 0.10           | g N.m <sup>-3</sup>               |
| $K_{\text{NO}_2,\text{OHO,AS}}$                       | Half-saturation of NO <sub>2</sub> for OHOs (AS)                                              | 0.05           | g N.m <sup>-3</sup>               |
| $K_{\text{VFA,FERM,AS}}$                              | Half-saturation of VFA in fermentation of OHOs (AS)                                           | 50.0           | g COD.m <sup>-3</sup>             |
| $\text{Logrange}_{\text{VFA,FERM,AS}}$                | Effective range of logistic switch for VFA fermentation by OHOs (AS)                          | 0.012          | -                                 |
| $K_{\text{SB,ana,AS}}$                                | Half-saturation of readily biodegradable substrate in fermentation by OHOs in mainstream (AS) | 5.0            | g COD.m <sup>-3</sup>             |
| $K_{\text{SB,ana,DIG}}$                               | Half-saturation of readily biodegradable substrate in fermentation by OHOs in digester        | 350.0          | g COD.m <sup>-3</sup>             |

| <b>Carbon storing organism kinetics (CASTO: PAO &amp; GAO)</b> |                                                                     |                |                                      |
|----------------------------------------------------------------|---------------------------------------------------------------------|----------------|--------------------------------------|
| <b>Symbol</b>                                                  | <b>Name</b>                                                         | <b>Default</b> | <b>Unit</b>                          |
| $\mu_{\text{CASTO}}$                                           | Maximum specific growth rate of CASTOs                              | 1.00           | $\text{d}^{-1}$                      |
| $q_{\text{PAO,PP}}$                                            | Maximum polyphosphate uptake rate of PAOs                           | 0.10           | $\text{d}^{-1}$                      |
| $\mu_{\text{FERM,PAO}}$                                        | Fermentation growth rate of PAOs                                    | 0.45           | $\text{d}^{-1}$                      |
| $\mu_{\text{PAO,lim}}$                                         | Maximum specific growth rate of PAOs under P limited                | 0.49           | $\text{d}^{-1}$                      |
| $b_{\text{CASTO}}$                                             | Decay rate of CASTOs                                                | 0.08           | $\text{d}^{-1}$                      |
| $b_{\text{STC}}$                                               | Rate of CASTOs maintenance on PHA and GLY                           | 0.07           | $\text{d}^{-1}$                      |
| $b_{\text{PP,ana}}$                                            | Rate of PAOs maintenance under anaerobic conditions (PP cleavage)   | 0.01           | $\text{d}^{-1}$                      |
| $q_{\text{PAO,PHA}}$                                           | Rate of VFA storage into PHA for PAOs                               | 7.0            | $\text{d}^{-1}$                      |
| $q_{\text{GAO,GLY}}$                                           | Rate of VFA storage into glycogen for GAOs                          | 4.0            | $\text{d}^{-1}$                      |
| $\eta_{\text{CASTO,anox}}$                                     | Reduction factor for anoxic growth of CASTOs                        | 0.66           | unitless                             |
| $\eta_{\text{bCASTO,anox}}$                                    | Reduction factor for anoxic decay of CASTOs                         | 0.50           | unitless                             |
| $\eta_{\text{bCASTO,ana}}$                                     | Reduction factor for anaerobic decay of CASTOs                      | 0.25           | unitless                             |
| $\eta_{\text{bSTC,anox}}$                                      | Reduction factor for anoxic maintenance of CASTOs on PHA and GLY    | 0.66           | unitless                             |
| $\eta_{\text{bPP,aer}}$                                        | Reduction factor for aerobic maintenance of PAOs on PP              | 0.25           | unitless                             |
| $\eta_{\text{bPP,anox}}$                                       | Reduction factor for anoxic maintenance of PAOs on PP               | 0.50           | unitless                             |
| $K_{\text{PO}_4,\text{PAO,AS}}$                                | Half-saturation of $\text{PO}_4$ for PAOs (AS)                      | 0.30           | $\text{g P}\cdot\text{m}^{-3}$       |
| $\text{Logrange}_{\text{PO}_4,\text{PAO,AS,sat}}$              | Effective range of logistic switch for $\text{PO}_4$ uptake by PAOs | 0.80           | -                                    |
| $\text{Logrange}_{\text{PP,PAO,AS,sat}}$                       | Effective range of logistic switch for PP cleavage by PAOs          | 0.40           | -                                    |
| $K_{\text{PHA,cle}}$                                           | Half-saturation of PHA for PAOs at PP cleavage                      | 0.10           | $\text{g COD}\cdot\text{g COD}^{-1}$ |
| $K_{\text{PHA}}$                                               | Half-saturation of PHA for PAOs                                     | 0.01           | $\text{g COD}\cdot\text{g COD}^{-1}$ |
| $K_{\text{STC}}$                                               | Half-saturation of PHA and GLY for PAOs                             | 0.10           | $\text{g COD}\cdot\text{g COD}^{-1}$ |
| $K_{\text{O}_2,\text{CASTO,AS}}$                               | Half-saturation of $\text{O}_2$ for CASTOs (AS)                     | 0.05           | $\text{g O}_2\cdot\text{m}^{-3}$     |
| $K_{\text{NO}_3,\text{CASTO,AS}}$                              | Half-saturation of $\text{NO}_3$ for CASTOs (AS)                    | 0.10           | $\text{g N}\cdot\text{m}^{-3}$       |

|                            |                                                                                  |        |                    |
|----------------------------|----------------------------------------------------------------------------------|--------|--------------------|
| $K_{NO_2,CASO,AS}$         | Half-saturation of $NO_2$ for CASTOs (AS)                                        | 0.05   | $g N.m^{-3}$       |
| $K_{VFA,CASO,AS}$          | Half-saturation of VFA storage for CASTOs (AS)                                   | 5.0    | $g COD.m^{-3}$     |
| $K_{PP}$                   | Half-saturation of PP for PAOs                                                   | 0.01   | $g COD.g COD^{-1}$ |
| $K_{iPP,PAO,max}$          | Half-inhibition of maximum PP content of PAOs                                    | 0.35   | $g P.g COD^{-1}$   |
| $Logrange_{PP,PAO,inh}$    | Effective range of logistic switch for PP/PAO inhibition term                    | 0.17   | -                  |
| $X_{PP,PAO,min}$           | PAO PP uptake booster denominator limiting term                                  | 0.10   | $g COD.m^{-3}$     |
| $K_{iPHA,PAO,max}$         | Half-inhibition of maximum PHA content of PAOs                                   | 0.60   | $g COD.g COD^{-1}$ |
| $Logrange_{PHA,PAO,inh}$   | Effective range of logistic switch for PHA/PAO inhibition term                   | 0.10   | -                  |
| $K_{Mg,PAO,AS}$            | Half-saturation of Mg (counter-ion in PP storage) for PAOs (AS)                  | 0.001  | $g Mg.m^{-3}$      |
| $K_{K,PAO,AS}$             | Half-saturation of K (counter-ion in PP storage) for PAOs (AS)                   | 0.001  | $g K.m^{-3}$       |
| $K_{Ca,PAO,AS}$            | Half-saturation of Ca (counter-ion in PP storage) for PAOs (AS)                  | 0.001  | $g Ca.m^{-3}$      |
| $K_{PP,lim}$               | Half-saturation of PP (nutrient) for PAOs under $PO_4$ limitation (AS)           | 0.002  | $g P.m^{-3}$       |
| $K_{iPO_4,lim,AS}$         | Half-inhibition of $PO_4$ for PAOs under $PO_4$ limitation (AS)                  | 0.005  | $g P.m^{-3}$       |
| $Logsat_{ORP,PAO,Half}$    | Logistic half-saturation of ORP switching in fermentation of PAO                 | -170.0 | mV                 |
| $Logsat_{ORP,PAO,Slope}$   | Logistic slope of ORP switching in fermentation of PAO                           | 0.1    | $mV^{-1}$          |
| $\eta_{bGLY,ana}$          | Reduction factor for anaerobic maintenance of GAOs on glycogen                   | 0.10   | unitless           |
| $K_{GLY}$                  | Half-saturation of glycogen for GAOs (AS)                                        | 0.05   | $g COD.g COD^{-1}$ |
| $K_{iGLY,GAO,max}$         | Half-inhibition of maximum glycogen content of GAOs (AS)                         | 0.5    | $g COD.g COD^{-1}$ |
| $Logrange_{GLY,GAO,inh}$   | Effective range of logistic switch for GLY/GAO inhibition term                   | 0.12   | -                  |
| $Switch_{GAO,Act,VFA}$     | Manual Switch for Activity of VFA Uptake by GAO                                  | 0.00   | -                  |
| $Logsat_{ORP,GAO,Half,15}$ | Half-value of ORP switch of glycogen storage by GAO at $15^\circ C / 59^\circ F$ | -30    | mV                 |
| $Logsat_{ORP,GAO,Half,25}$ | Half-value of ORP switch of glycogen storage by GAO at $25^\circ C / 77^\circ F$ | -110   | mV                 |
| $Logsat_{ORP,GAO,Slope}$   | Logistic slope of ORP switching of GAOs                                          | 0.035  | $mV^{-1}$          |

**Figure S1:** Impact of SRT on effluent OP.

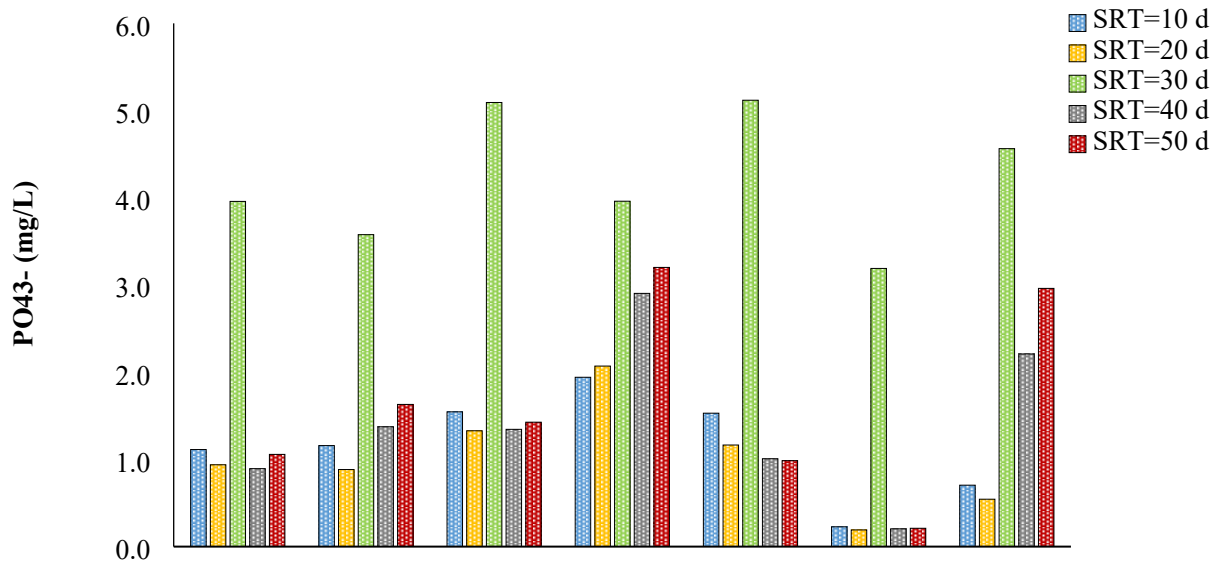

## References

- 1 F. Sabba, M. Farmer, Z. Jia, F. Di Capua, P. Dunlap, J. Barnard, C. D. Qin, J. A. Kozak, G. Wells and L. Downing, Impact of operational strategies on a sidestream enhanced biological phosphorus removal (S2EBPR) reactor in a carbon limited wastewater plant, *Sci. Total Environ.*, 2023, 857, 159280. DOI: [10.1016/j.scitotenv.2022.159280](https://doi.org/10.1016/j.scitotenv.2022.159280).
